# Supplementary material for: A facile and green preparation of poly(glycidyl methacrylate) coated aramide fibers
Source: Royal Society of Chemistry journal article supplement (doi:10.1039/c2jm16602j), 2012-01-01
Supplement: c2jm16602j.pdf [file c2jm16602j.pdf]

Chain initiation

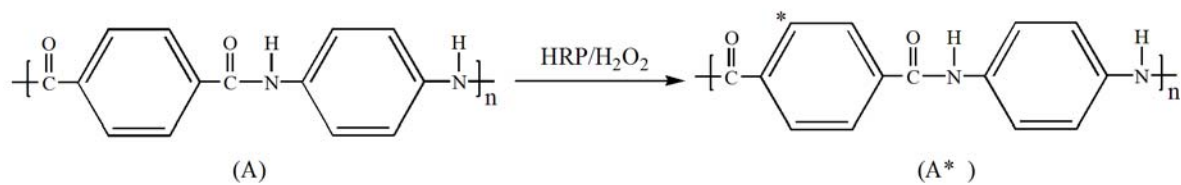

Chain propagation

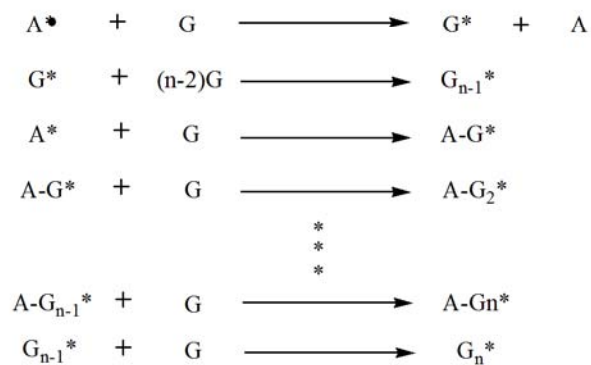

Chain termination

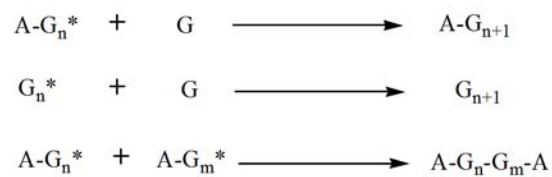

A: Aramide fibers    A\* : free radicals of Aramide fibers    G: monomer of GMA    G\* : free radicals of GMA

Scheme 1S The synthesis mechanism of PGMA on the surface of KF fibers
